# Supplementary material
Source: Springer Nature journal article supplement (https://www.springermedizin.de/resource/supplementary/13045_2013_322_MOESM4_ESM.pdf/9661106)
Supplement: MOESM4 [file 9661106]

**Figure 2. Disease progression and survival according two periods of time**

**2A. Overall Survival according to periods of time**

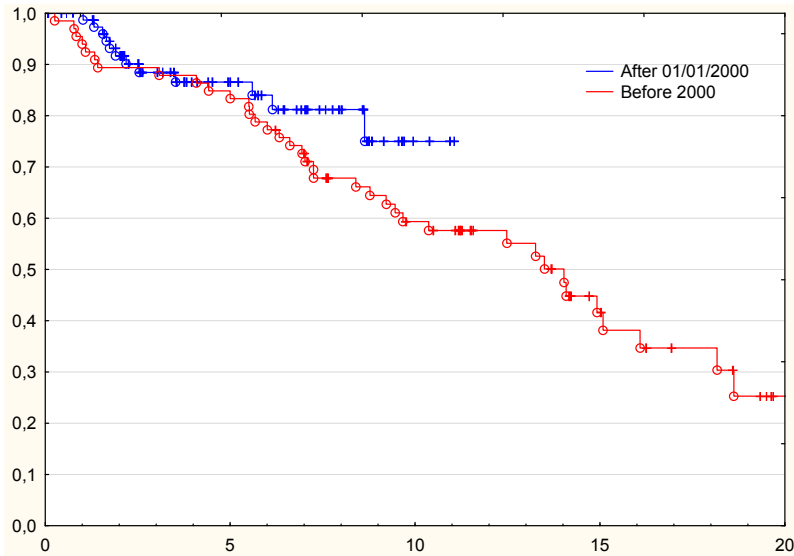

**2A. Progression Free Survival according to periods of time**

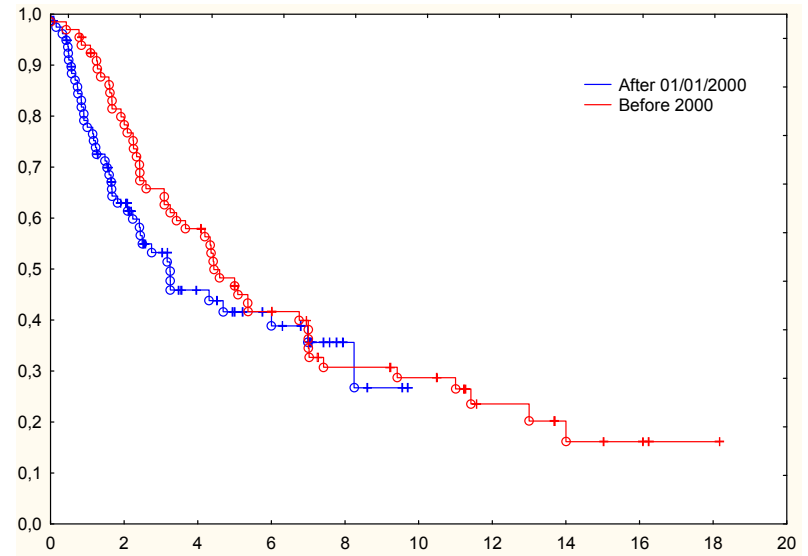

**2 periods: < 2000 and > or = 2000**
